# Supplementary material for: The Impact of Berberine on Intestinal Morphology, Microbes, and Immune Function of Broilers in Response to Necrotic Enteritis Challenge
Source: Hindawi journal article supplement (doi:10.1155/2021/1877075), 2021-01-01
Supplement: f1 [file 1877075.f1.pdf]

## Performance

|     | 1-14 d   |           |             | 15-21 d  |           |             | 22-28 d  |           |             |
|-----|----------|-----------|-------------|----------|-----------|-------------|----------|-----------|-------------|
|     | ADG(g/d) | ADFI(g/d) | FCR         | ADG(g/d) | ADFI(g/d) | FCR         | ADG(g/d) | ADFI(g/d) | FCR         |
| 1-1 | 28.65    | 35.17     | 1.227574171 | 56.47    | 77.35     | 1.369753852 | 66.99    | 101.92    | 1.521421108 |
| 1-2 | 27.38    | 32.29     | 1.179327977 | 59.93    | 79.11     | 1.320040047 | 72.52    | 115.69    | 1.59528406  |
| 1-3 | 28.53    | 32.86     | 1.151770067 | 55.95    | 75.27     | 1.345308311 | 73.17    | 107.42    | 1.468088014 |
| 1-4 | 28.78    | 34.01     | 1.181723419 | 64.26    | 86.36     | 1.343915344 | 72.04    | 114.33    | 1.587034981 |
| 1-5 | 29.17    | 34.74     | 1.190949606 | 64.99    | 85.68     | 1.31835667  | 67.56    | 113.81    | 1.684576673 |
| 1-6 | 29.92    | 35.3      | 1.179812834 | 62.14    | 84.04     | 1.352429997 | 65.51    | 105.26    | 1.606777591 |
| 2-1 | 29.76    | 36.04     | 1.211021505 | 52.39    | 75.38     | 1.438824203 | 63.45    | 104.67    | 1.64964539  |
| 2-2 | 29.34    | 34.31     | 1.16939332  | 54.73    | 76.21     | 1.392472136 | 59.37    | 111.79    | 1.882937511 |
| 2-3 | 28.32    | 33.53     | 1.183968927 | 57.06    | 81.84     | 1.434279706 | 57.88    | 105.01    | 1.814270905 |
| 2-4 | 30.86    | 36.88     | 1.19507453  | 52.79    | 74.07     | 1.403106649 | 63.34    | 103.62    | 1.63593306  |
| 2-5 | 29.77    | 35.76     | 1.201209271 | 57.01    | 81.69     | 1.432906508 | 56.92    | 110.34    | 1.93851019  |
| 2-6 | 29.51    | 35.48     | 1.202304304 | 51.88    | 75.95     | 1.463955281 | 62.11    | 104.88    | 1.68861697  |
| 3-1 | 29.36    | 36.01     | 1.226498638 | 48.9     | 74.35     | 1.520449898 | 65.34    | 112.33    | 1.71916131  |
| 3-2 | 29.51    | 34.3      | 1.162317858 | 54.23    | 76.42     | 1.409183109 | 63.75    | 111.56    | 1.749960784 |
| 3-3 | 30.74    | 36.24     | 1.178919974 | 55.15    | 78.03     | 1.41486854  | 65.52    | 114.74    | 1.751221001 |
| 3-4 | 29.6     | 35.32     | 1.193243243 | 57.92    | 81.62     | 1.409185083 | 71.13    | 119.31    | 1.677351329 |
| 3-5 | 28.33    | 35.09     | 1.238616308 | 48.27    | 73.59     | 1.52454941  | 71.48    | 106.75    | 1.493424734 |
| 3-6 | 28.47    | 33.33     | 1.170706006 | 57.38    | 80.47     | 1.402405019 | 66.96    | 108.06    | 1.613799283 |
| 4-1 | 28.81    | 33.52     | 1.163484901 | 58.49    | 81.56     | 1.394426398 | 65.24    | 107.14    | 1.642244022 |
| 4-2 | 29.25    | 35.48     | 1.212991453 | 50.62    | 75.11     | 1.483800869 | 71.79    | 105.37    | 1.467753169 |
| 4-3 | 29.82    | 33.97     | 1.139168343 | 49.96    | 74.19     | 1.48498799  | 63.67    | 109.69    | 1.722789383 |
| 4-4 | 27.34    | 32.25     | 1.179590344 | 51.44    | 77.58     | 1.508164852 | 62       | 108.78    | 1.754516129 |
| 4-5 | 30.83    | 35.56     | 1.153421992 | 58.53    | 82.35     | 1.406970784 | 69.12    | 117.39    | 1.698350694 |
| 4-6 | 28.33    | 33.71     | 1.189904695 | 57.71    | 78.69     | 1.363541847 | 69.03    | 112.54    | 1.630305664 |

## Intestinal morphology

|     | ILS | Duodenum     |              |           | Jejunum      |              |           | Ileum        |              |           |
|-----|-----|--------------|--------------|-----------|--------------|--------------|-----------|--------------|--------------|-----------|
|     |     | VH( $\mu$ m) | CD( $\mu$ m) | VH/CD     | VH( $\mu$ m) | CD( $\mu$ m) | VH/CD     | VH( $\mu$ m) | CD( $\mu$ m) | VH/CD     |
| 1-1 | 0   | 899.84       | 202.99       | 4.4329277 | 712.63       | 155.94       | 4.5698987 | 596.19       | 129.81       | 4.5927895 |
| 1-2 | 0.5 | 918.03       | 199.26       | 4.6071966 | 837.54       | 173.08       | 4.839034  | 654.07       | 153.39       | 4.2640981 |
| 1-3 | 0.5 | 947.71       | 172.45       | 5.4955639 | 867.69       | 151.14       | 5.7409686 | 566.84       | 130.83       | 4.3326454 |
| 1-4 | 0   | 908.22       | 169.72       | 5.3512845 | 871.22       | 147.33       | 5.9133917 | 490.64       | 144.9        | 3.3860594 |
| 1-5 | 0   | 840.36       | 205.74       | 4.0845728 | 729.8        | 167.62       | 4.3538957 | 658.93       | 120.05       | 5.4887963 |
| 1-6 | 0   | 963.09       | 183.03       | 5.2619243 | 832          | 157.37       | 5.14      | 572.97       | 138.07       | 4.1498515 |
| 2-1 | 2   | 913.95       | 199.44       | 4.5825812 | 712.3        | 189.06       | 3.767587  | 543.25       | 139.7        | 3.8886901 |
| 2-2 | 3   | 826.46       | 204.35       | 4.0443357 | 800.79       | 155.3        | 5.156407  | 622.43       | 133.21       | 4.6725471 |
| 2-3 | 3   | 895.35       | 191.76       | 4.6691176 | 816.83       | 178.34       | 4.5801839 | 604.42       | 163.24       | 3.7026464 |
| 2-4 | 0.5 | 890.79       | 187.02       | 4.7630735 | 789.97       | 187.85       | 4.2053234 | 528.99       | 149.37       | 3.5414742 |
| 2-5 | 2   | 791.14       | 211.87       | 3.7340822 | 864.06       | 161.72       | 5.3429384 | 561.97       | 141.46       | 3.9726424 |
| 2-6 | 3   | 971.06       | 178.42       | 5.4425513 | 690          | 158.56       | 4.351665  | 597.04       | 159.22       | 3.7497802 |
| 3-1 | 1   | 1186         | 177.03       | 6.6994295 | 786.74       | 181.51       | 4.3344168 | 555.39       | 126.99       | 4.373494  |
| 3-2 | 0.5 | 1066.71      | 196.74       | 5.4219274 | 888.28       | 179.25       | 4.955537  | 578.91       | 145.56       | 3.9771228 |
| 3-3 | 0   | 1107.36      | 205.33       | 5.3930746 | 896.45       | 173.22       | 5.1752107 | 702.74       | 119.79       | 5.8664329 |
| 3-4 | 0   | 1034.69      | 184.51       | 5.6077719 | 782.37       | 157.65       | 4.9627022 | 540.05       | 148.06       | 3.6475078 |
| 3-5 | 1   | 1171.57      | 186.65       | 6.2768283 | 773.86       | 160.54       | 4.8203563 | 682.16       | 150.09       | 4.5450063 |
| 3-6 | 0.5 | 1044.7       | 213.47       | 4.8938961 | 792.11       | 155.02       | 5.1097278 | 592.44       | 128.02       | 4.6277144 |
| 4-1 | 0   | 1184.36      | 171.61       | 6.9014626 | 825.71       | 174.4        | 4.7345757 | 568.61       | 129.51       | 4.3904718 |
| 4-2 | 1   | 1156.72      | 202.44       | 5.7138905 | 825.64       | 164.09       | 5.031629  | 519.16       | 129.19       | 4.0185773 |
| 4-3 | 0   | 1229.31      | 176.83       | 6.9519312 | 774.45       | 146          | 5.3044521 | 519.72       | 149.89       | 3.4673427 |
| 4-4 | 0   | 1065.08      | 190.78       | 5.5827655 | 930.19       | 178.53       | 5.2102728 | 620.21       | 138.17       | 4.4887457 |
| 4-5 | 0   | 1089.5       | 201.5        | 5.4069479 | 799.35       | 134.95       | 5.9233049 | 655.55       | 122.93       | 5.3327097 |
| 4-6 | 1   | 1095.41      | 194.32       | 5.6371449 | 932.78       | 152.88       | 6.1013867 | 547.04       | 115.94       | 4.7183026 |

## Cecum microflora(Log10CFU/g)

|     | <i>C. perfringens</i> | <i>E. coli</i> | <i>Lactobacillus</i> spp. |
|-----|-----------------------|----------------|---------------------------|
| 1-1 | 2.14                  | 5.14           | 7.13                      |
| 1-2 | 3.23                  | 4.58           | 5.89                      |
| 1-3 | 2.06                  | 6.71           | 5.83                      |
| 1-4 | 2.79                  | 5.84           | 6.74                      |
| 1-5 | 2.82                  | 5.99           | 6.05                      |
| 1-6 | 2.26                  | 4.87           | 6.1                       |
| 2-1 | 6.89                  | 5              | 6.3                       |
| 2-2 | 5.77                  | 5.83           | 5.57                      |
| 2-3 | 7.14                  | 6.12           | 6.02                      |
| 2-4 | 6.17                  | 5.03           | 5.45                      |
| 2-5 | 6.69                  | 4.76           | 7.05                      |
| 2-6 | 6.03                  | 4.54           | 6.93                      |
| 3-1 | 4.89                  | 6.16           | 6.19                      |
| 3-2 | 3.52                  | 5.12           | 5.95                      |
| 3-3 | 4.3                   | 5.07           | 7.43                      |
| 3-4 | 3.89                  | 6.49           | 7.34                      |
| 3-5 | 3.68                  | 5.28           | 5.63                      |
| 3-6 | 4.56                  | 6.02           | 7.39                      |
| 4-1 | 4.45                  | 4.81           | 5.34                      |
| 4-2 | 4.47                  | 4.76           | 6.27                      |
| 4-3 | 3.38                  | 5.55           | 4.52                      |
| 4-4 | 4.21                  | 4.28           | 6.3                       |
| 4-5 | 3.16                  | 4.6            | 6.2                       |
| 4-6 | 3.19                  | 5.69           | 6.35                      |

## Heal cytokines (pg/mg)

|     | <b>IL-1<math>\beta</math></b> | <b>IL-6</b> | <b>TNF-<math>\alpha</math></b> |
|-----|-------------------------------|-------------|--------------------------------|
| 1-1 | 79.44                         | 118.71      | 275                            |
| 1-2 | 82.57                         | 133.04      | 278.11                         |
| 1-3 | 100.05                        | 109.51      | 261.38                         |
| 1-4 | 98.34                         | 135         | 240.65                         |
| 1-5 | 81.62                         | 141.66      | 289.42                         |
| 1-6 | 97.29                         | 117.44      | 239.5                          |
| 2-1 | 114.89                        | 153.26      | 378.91                         |
| 2-2 | 107.83                        | 168.66      | 332.56                         |
| 2-3 | 130.45                        | 171.41      | 363.49                         |
| 2-4 | 118                           | 150.84      | 344.1                          |
| 2-5 | 139.75                        | 179         | 370.54                         |
| 2-6 | 112.6                         | 182.17      | 330.28                         |
| 3-1 | 69.24                         | 105.72      | 254.07                         |
| 3-2 | 87.07                         | 100.07      | 259.11                         |
| 3-3 | 84.2                          | 109.78      | 266.95                         |
| 3-4 | 72.69                         | 134.15      | 237.34                         |
| 3-5 | 90.56                         | 107.66      | 214.21                         |
| 3-6 | 78.93                         | 128.08      | 231                            |
| 4-1 | 66.17                         | 104.19      | 193.58                         |
| 4-2 | 64.96                         | 87.1        | 245.3                          |
| 4-3 | 77.2                          | 109.67      | 203.39                         |
| 4-4 | 78.18                         | 86.45       | 210.88                         |
| 4-5 | 66.44                         | 117.58      | 248.74                         |
| 4-6 | 77.32                         | 94.68       | 224.51                         |

## **mRNA relative ratio**

|     | <b>Occludin</b> | <b>Claudin-1</b> | <b>Claudin-2</b> | <b>ZO-1</b> |
|-----|-----------------|------------------|------------------|-------------|
| 1-1 | 0.87            | 0.94             | 1.12             | 1.05        |
| 1-2 | 1.09            | 0.89             | 1.07             | 0.93        |
| 1-3 | 0.94            | 1.06             | 0.9              | 1.02        |
| 1-4 | 1               | 1                | 0.95             | 1.01        |
| 1-5 | 1.01            | 1.07             | 0.86             | 0.88        |
| 1-6 | 1.11            | 1.03             | 1.09             | 1.12        |
| 2-1 | 0.52            | 0.86             | 1.02             | 0.75        |
| 2-2 | 0.54            | 0.81             | 1.09             | 0.91        |
| 2-3 | 0.44            | 0.62             | 1.13             | 0.99        |
| 2-4 | 0.36            | 0.54             | 0.91             | 0.73        |
| 2-5 | 0.44            | 0.59             | 1.07             | 1.01        |
| 2-6 | 0.51            | 0.65             | 1.2              | 0.75        |
| 3-1 | 0.97            | 0.7              | 1.07             | 0.71        |
| 3-2 | 1.01            | 1.04             | 0.93             | 1.05        |
| 3-3 | 0.78            | 1.07             | 1.14             | 0.77        |
| 3-4 | 1.04            | 1.02             | 1.11             | 0.94        |
| 3-5 | 0.71            | 0.91             | 1.1              | 0.79        |
| 3-6 | 0.78            | 0.8              | 0.98             | 1.02        |
| 4-1 | 1.02            | 0.87             | 0.9              | 1.06        |
| 4-2 | 1.04            | 0.99             | 0.89             | 0.96        |
| 4-3 | 0.82            | 1.07             | 0.84             | 1.05        |
| 4-4 | 1.2             | 0.76             | 1.08             | 0.75        |
| 4-5 | 0.86            | 0.7              | 0.9              | 0.95        |
| 4-6 | 1.2             | 0.77             | 1.12             | 0.79        |
